# Supplementary material
Source: PubMed Central journal article supplement (PMC6404535)
Supplement: NIHMS1005546-supplement-1.pdf [file NIHMS1005546-supplement-1.pdf]

## Supplemental Figure Legends

### Supplemental Figure 1. Installation of a reverse-oriented T7 promoter to make *Rev Luc-UTR pcDNA 3.1*

(-). Vector and hybridized oligos containing a T7 promoter and M13 sequencing primer were cut with BamHI and HindIII then ligated together and transformed into *E. coli* with standard molecular biology techniques. Figures are drawn to scale. A black vertical line indicates a restriction site; a gray box represents a T7 promoter; red box, beta-globin untranslated region; green box with arrowhead, optimized luciferase coding region; black horizontal line, plasmid backbone (remaining plasmid not shown). The white slash through the luciferase coding region indicates a break in the sequence to allow the relevant parts of the plasmid drawn to scale.

### Supplemental Figure 2. Installation of an internal poly(A) tract to make *Luc-UTR 80A pc DNA3.1* (-).

Vector and two sets of hybridized oligos were cut at the labeled restriction sites, ligated together, and transformed into *E. coli* with standard molecular biology techniques. An A<sub>62</sub> tract was expected from this ligation. One clone was identified with an A<sub>33</sub> tract installation and the correct surrounding sequence, and this plasmid was used further. Utilizing NEB's Q5 Site Directed Mutagenesis kit and the oligos listed, a BsmBI restriction site was edited out to allow for further construction of the poly(A) tract. The poly(A) tract was then expanded from A<sub>33</sub> to A<sub>57</sub> to A<sub>81</sub> using standard molecular biology techniques. Linearization with BsmBI and in vitro transcription allows for synthesis of an mRNA that contains only adenosine nucleotides in its poly(A) tail.

### Supplemental Figure 3. Installation of a reverse-oriented T7 promoter to make *Rev Luc-UTR-pcDNA 3.1*

(-). Annealed oligos were ligated into cut vector and transformed into *E. coli* using standard molecular biology techniques.

**Supplemental Figure 4.** PCR-mediated synthesis of *Luc-DNA*. Primers as shown were utilized to amplify the luciferase coding region of *Luc-UTR pcDNA 3.1 (-)* and install the reverse oriented T7 promoter.

**Supplemental Figure 5.** Full sequence of all mRNAs used in this study. The sequences were aligned using a line splitting program designed by an author (STC). The m7G designates a 7-methylguanylate cap. The mRNA sequences are highlighted according to the key to demarcate the regions of interest.

## Supplemental Figure S1

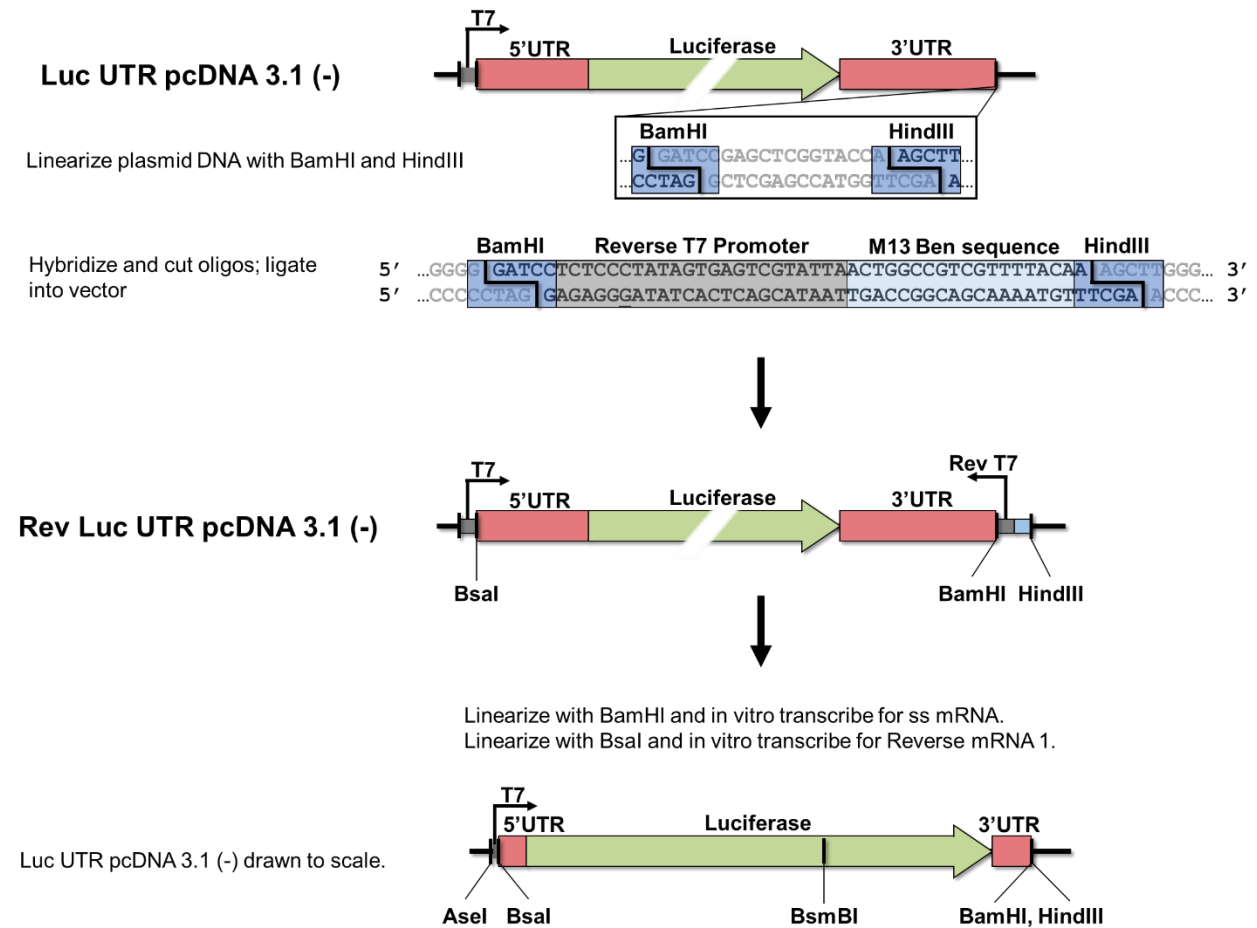

## Supplemental Figure S2

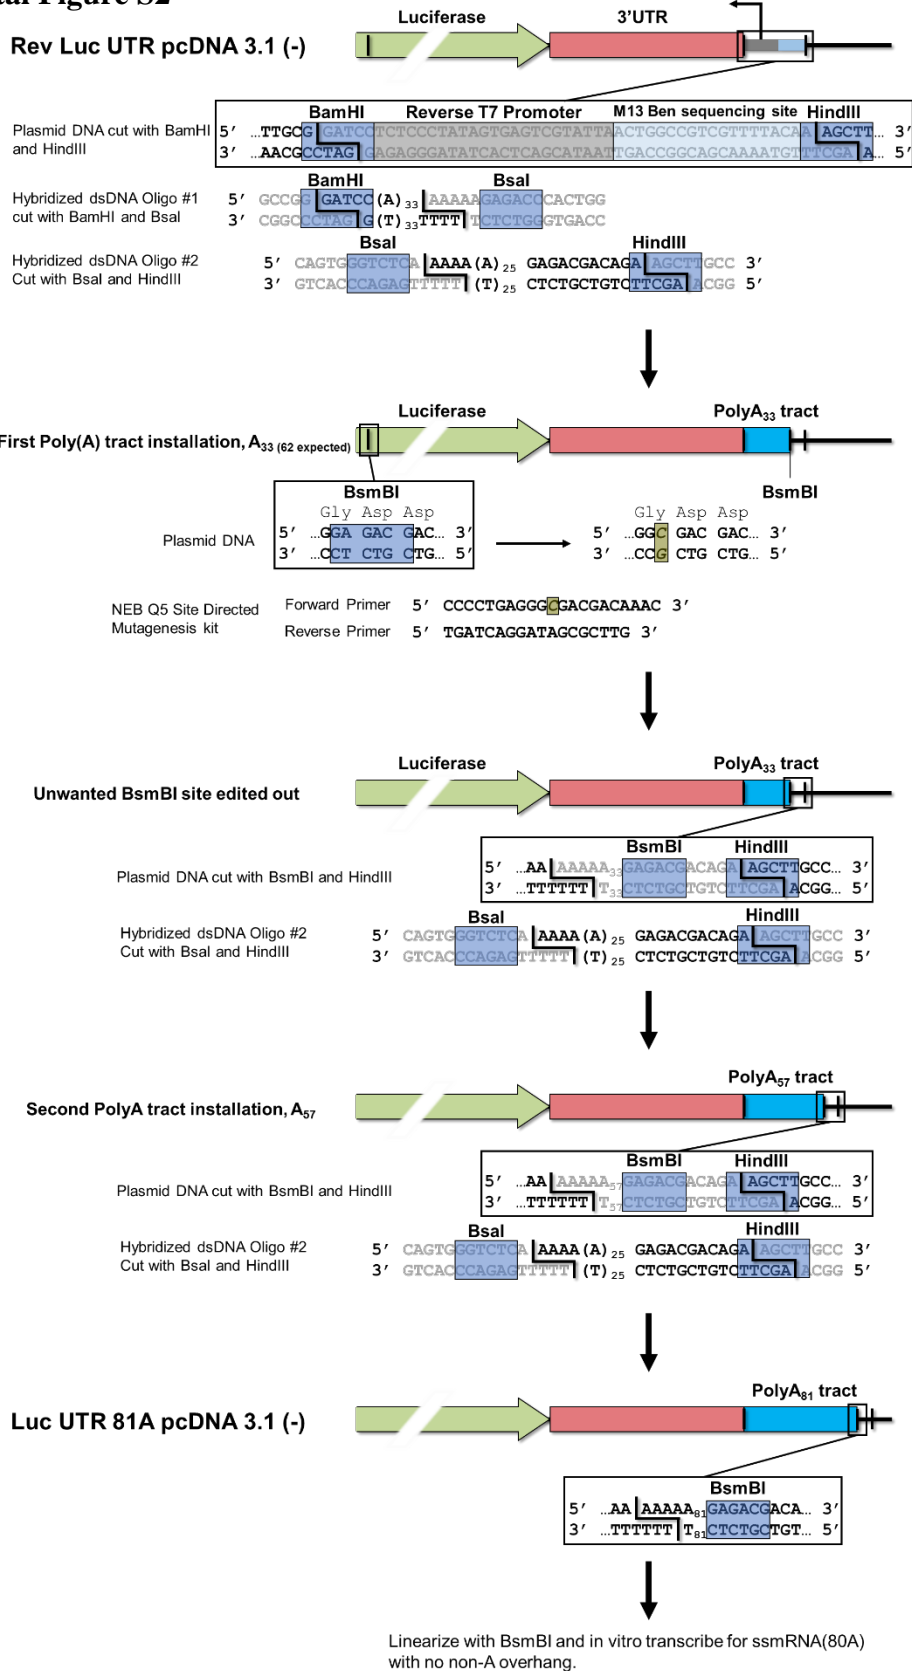

### Supplemental Figure S3

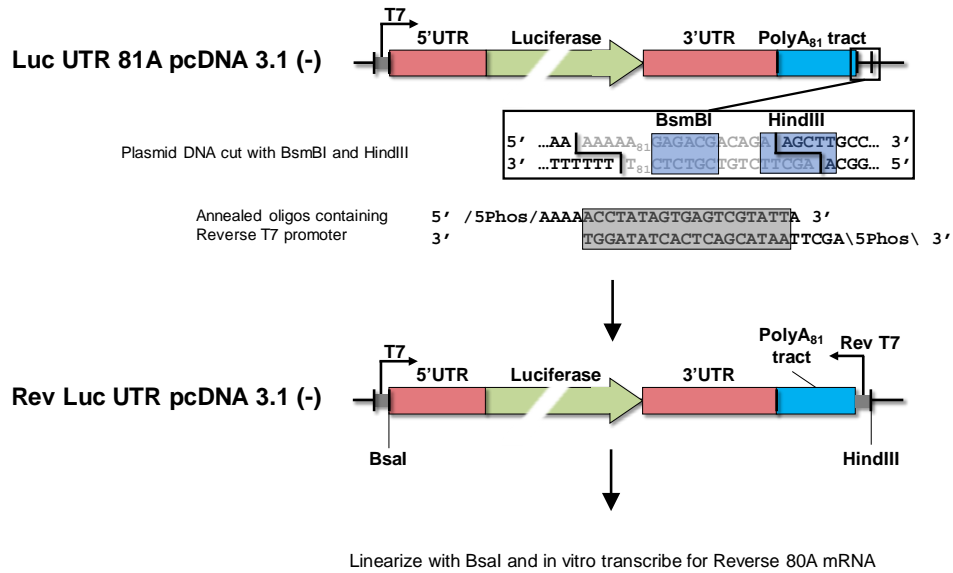

**Supplemental Figure S4**

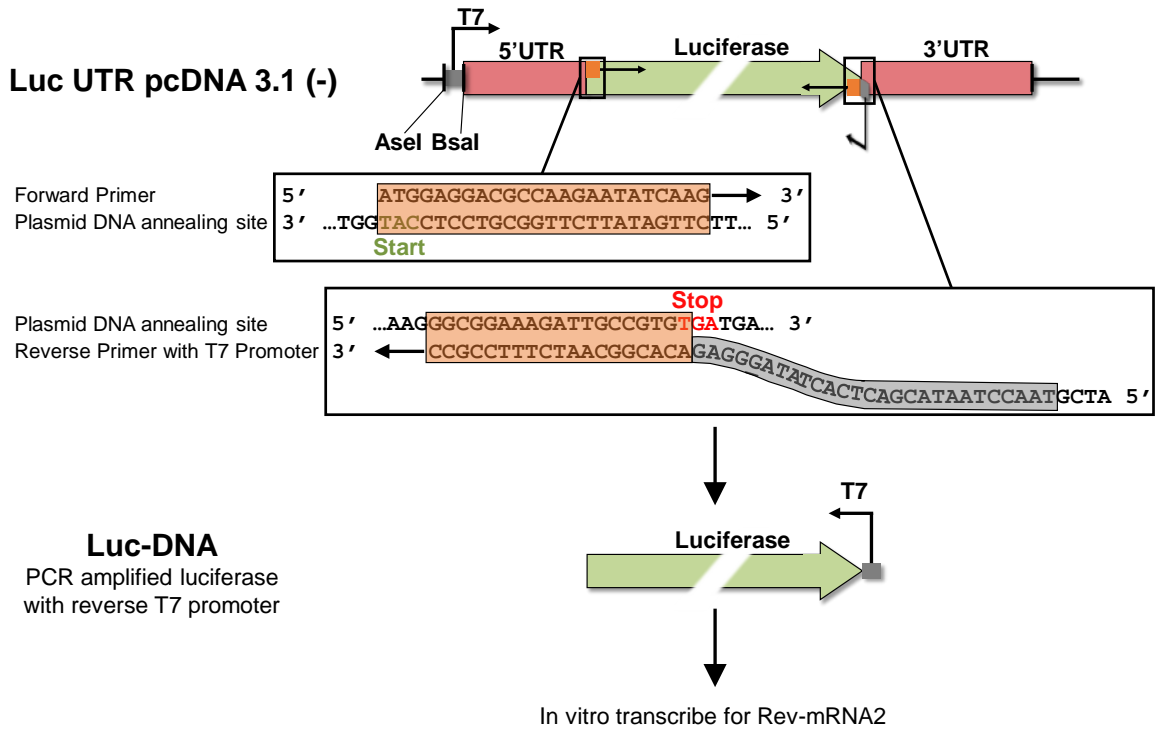

## Supplemental Figure S5

Key: Overhangs on reverse strands Human Beta Globin 5' and 3' UTRs Start Codon Mutated Base Stop Codon

ss mRNA : 5' m7G-GGGAGACCCAAGCUGGCUAGCGUUUAAACGGGCCCCUCUAGAACAUUUGCUUCUGACACA  
ss 80A mRNA : 5' m7G-GGGAGACCCAAGCUGGCUAGCGUUUAAACGGGCCCCUCUAGAACAUUUGCUUCUGACACA  
Reverse 1 : 3' UAUCCCUCUGGGUUCGACCGAUCGCAAUUUGCCCGGGAGAUCUUUGUAAACGAAGACUGUGU  
Reverse 2 : 3'  
Reverse 80A : 3' UAUCCCUCUGGGUUCGACCGAUCGCAAUUUGCCCGGGAGAUCUUUGUAAACGAAGACUGUGU

ss mRNA : ACUGUGUUCACUAGCAACCCUCAAACAGACACCGCCGCCACCAUGGAGGACGCCAAGAAUAUCAAGAA  
ss 80A mRNA : ACUGUGUUCACUAGCAACCCUCAAACAGACACCGCCGCCACCAUGGAGGACGCCAAGAAUAUCAAGAA  
Reverse 1 : UGACACAAGUGAUUCGUUGGAGUUUGUCUGUGGGCGGCGGUGGUACCUCCUGCGGUUCUUAUAGUUCUU  
Reverse 2 : UACCUCCUGCGGUUCUUAUAGUUCUU  
Reverse 80A : UGACACAAGUGAUUCGUUGGAGUUUGUCUGUGGGCGGCGGUGGUACCUCCUGCGGUUCUUAUAGUUCUU

ss mRNA : AGGCCCCGCUCUCCUUCUACCCCCUGGAAGACGGCACAGCCGGCGAACAACUCCACAAGGCCAUGAAG  
ss 80A mRNA : AGGCCCCGCUCUCCUUCUACCCCCUGGAAGACGGCACAGCCGGCGAACAACUCCACAAGGCCAUGAAG  
Reverse 1 : UCCGGGGCGAGGGAAGAUGGGGGACCUUCUGCCGUGUCGGCCGCUUGUUGAGGUGUUCGGUACUUC  
Reverse 2 : UCCGGGGCGAGGGAAGAUGGGGGACCUUCUGCCGUGUCGGCCGCUUGUUGAGGUGUUCGGUACUUC  
Reverse 80A : UCCGGGGCGAGGGAAGAUGGGGGACCUUCUGCCGUGUCGGCCGCUUGUUGAGGUGUUCGGUACUUC

ss mRNA : AGGUAUGCCCUGGUCCCCGGAACCAUCGCCUUCACCGAUGCCCAUAUCGAGGUCGACAUCACCUACG  
ss 80A mRNA : AGGUAUGCCCUGGUCCCCGGAACCAUCGCCUUCACCGAUGCCCAUAUCGAGGUCGACAUCACCUACG  
Reverse 1 : UCCAUACGGGACCAGGGGCCUUGGUAGCGGAAGUGGCUACGGGUAUAGCUCACGUCUGUAGUGGAUGC  
Reverse 2 : UCCAUACGGGACCAGGGGCCUUGGUAGCGGAAGUGGCUACGGGUAUAGCUCACGUCUGUAGUGGAUGC  
Reverse 80A : UCCAUACGGGACCAGGGGCCUUGGUAGCGGAAGUGGCUACGGGUAUAGCUCACGUCUGUAGUGGAUGC

ss mRNA : CUGAGUACUUCGAGAUGUCCGUCAGGCUCGCCGAGGCUAUGAAGAGAUUAGGCCUCAACACCAACCA  
ss 80A mRNA : CUGAGUACUUCGAGAUGUCCGUCAGGCUCGCCGAGGCUAUGAAGAGAUUAGGCCUCAACACCAACCA  
Reverse 1 : GACUCAUGAAGCUCUACAGGCAGUCCGAGCGGCUCCGAUACUUCUCUAUACCGGAGUUGUGGUUGGU  
Reverse 2 : GACUCAUGAAGCUCUACAGGCAGUCCGAGCGGCUCCGAUACUUCUCUAUACCGGAGUUGUGGUUGGU  
Reverse 80A : GACUCAUGAAGCUCUACAGGCAGUCCGAGCGGCUCCGAUACUUCUCUAUACCGGAGUUGUGGUUGGU

ss mRNA : CAGGAUCGUGGUCUGCUCUCCGAGAACUCCUUGCAGUUUUUCAUGCCCUGUCUGGGCGCCCUGUUUAUC  
ss 80A mRNA : CAGGAUCGUGGUCUGCUCUCCGAGAACUCCUUGCAGUUUUUCAUGCCCUGUCUGGGCGCCCUGUUUAUC  
Reverse 1 : GUCCUAGCACCAGACGAGGCUCUUGAGGGACGUCAAAAAGUACGGGCACGACCCGCGGGACAAUAG  
Reverse 2 : GUCCUAGCACCAGACGAGGCUCUUGAGGGACGUCAAAAAGUACGGGCACGACCCGCGGGACAAUAG  
Reverse 80A : GUCCUAGCACCAGACGAGGCUCUUGAGGGACGUCAAAAAGUACGGGCACGACCCGCGGGACAAUAG

ss mRNA : GGAGUCGCCGUCGCCCCCGCUAACGACAUCUACAACGAGAGAGAGCUCUGAACAGCAUGGGCAUUU  
ss 80A mRNA : GGAGUCGCCGUCGCCCCCGCUAACGACAUCUACAACGAGAGAGAGCUCUGAACAGCAUGGGCAUUU  
Reverse 1 : CCUCAGCGGCAGCGGGGGCGAUUGCUGUAGAUGUUGCUCUCUCUCGAGGACUUGUCGUACCCGUAAA  
Reverse 2 : CCUCAGCGGCAGCGGGGGCGAUUGCUGUAGAUGUUGCUCUCUCUCGAGGACUUGUCGUACCCGUAAA  
Reverse 80A : CCUCAGCGGCAGCGGGGGCGAUUGCUGUAGAUGUUGCUCUCUCUCGAGGACUUGUCGUACCCGUAAA

ss mRNA : CCCAGCCUACCGUGGUCUUCGUGAGCAAGAAAGGCCUCCAGAAGAUCUGAACGUCUCCAAAAGAAGCU  
ss 80A mRNA : CCCAGCCUACCGUGGUCUUCGUGAGCAAGAAAGGCCUCCAGAAGAUCUGAACGUCUCCAAAAGAAGCU  
Reverse 1 : GGGUCGGAUGGCACCAGAAGCACUCGUUCUUCUCCGGAGGUCUUCUAGGACUUGCAGGUUUUCUUCGA  
Reverse 2 : GGGUCGGAUGGCACCAGAAGCACUCGUUCUUCUCCGGAGGUCUUCUAGGACUUGCAGGUUUUCUUCGA  
Reverse 80A : GGGUCGGAUGGCACCAGAAGCACUCGUUCUUCUCCGGAGGUCUUCUAGGACUUGCAGGUUUUCUUCGA

ss mRNA : GCCCAUUAUCCAGAAGAUCAUCAUCAUGGAUAGCAAGACCGACUACCAGGGAUUCAGUCCAUGUAC

ss 80A mRNA : GCCCAUUAUCCAGAAGAUAUCAUCAUGGAUAGCAAGACCGACUACCAGGGAUUCAGUCCAUGUAC  
 Reverse 1 : CGGGUAAUAGGUCUUCUAGUAGUAGUACCUAUCGUUCUGGCUGAUGGUCCUAAGGUCAGGUACAUG  
 Reverse 2 : CGGGUAAUAGGUCUUCUAGUAGUAGUACCUAUCGUUCUGGCUGAUGGUCCUAAGGUCAGGUACAUG  
 Reverse 80A : CGGGUAAUAGGUCUUCUAGUAGUAGUACCUAUCGUUCUGGCUGAUGGUCCUAAGGUCAGGUACAUG

ss mRNA : ACCUUCGUGACAAGCCAUCUGCCCCCGGCUUCAACGAGUAUGACUUCGUCCCCGAGUCCUUCGACA  
 ss 80A mRNA : ACCUUCGUGACAAGCCAUCUGCCCCCGGCUUCAACGAGUAUGACUUCGUCCCCGAGUCCUUCGACA  
 Reverse 1 : UGGAAGCACUGUUCGGUAGACGGGGGGCCGAAGUUGCUCUAUCUGAAGCAGGGGCUCAGGAAGCUGU  
 Reverse 2 : UGGAAGCACUGUUCGGUAGACGGGGGGCCGAAGUUGCUCUAUCUGAAGCAGGGGCUCAGGAAGCUGU  
 Reverse 80A : UGGAAGCACUGUUCGGUAGACGGGGGGCCGAAGUUGCUCUAUCUGAAGCAGGGGCUCAGGAAGCUGU

ss mRNA : GAGACAAGACCAUCGCCUGAUCAUGAACUCCUCCGGAAGCACCGGACUGCCCAAAGGCGUGGCUCU  
 ss 80A mRNA : GAGACAAGACCAUCGCCUGAUCAUGAACUCCUCCGGAAGCACCGGACUGCCCAAAGGCGUGGCUCU  
 Reverse 1 : CUCUGUUCUGGUAGCGGGACUAGUACUUGAGGAGGCCUUCGUGGCCUGACGGGUUUCGACCCGAGA  
 Reverse 2 : CUCUGUUCUGGUAGCGGGACUAGUACUUGAGGAGGCCUUCGUGGCCUGACGGGUUUCGACCCGAGA  
 Reverse 80A : CUCUGUUCUGGUAGCGGGACUAGUACUUGAGGAGGCCUUCGUGGCCUGACGGGUUUCGACCCGAGA

ss mRNA : CCCUCACAGGACCGCUUGUGUCAGGUUCAGCCACGCCAGGGACCCCAUCUUCGGCAACCAGAUCAUC  
 ss 80A mRNA : CCCUCACAGGACCGCUUGUGUCAGGUUCAGCCACGCCAGGGACCCCAUCUUCGGCAACCAGAUCAUC  
 Reverse 1 : GGGAGUGUCCUGGCGAACACAGUCCAAGUCGGUGCGGUCCUGGGGUAGAAGCCGUUGGUCUAGUAG  
 Reverse 2 : GGGAGUGUCCUGGCGAACACAGUCCAAGUCGGUGCGGUCCUGGGGUAGAAGCCGUUGGUCUAGUAG  
 Reverse 80A : GGGAGUGUCCUGGCGAACACAGUCCAAGUCGGUGCGGUCCUGGGGUAGAAGCCGUUGGUCUAGUAG

ss mRNA : CCCGACACAGCUAUCCUCAGCGUGGUGCCCUUCCACCACGGCUUCGGAAUGUUCACCACCCUCGGCU  
 ss 80A mRNA : CCCGACACAGCUAUCCUCAGCGUGGUGCCCUUCCACCACGGCUUCGGAAUGUUCACCACCCUCGGCU  
 Reverse 1 : GGGCUGUGUCGAUAGGAGUCGCACCACGGGAAGGUGGUGCCGAAGCCUUAACAAGUGGUGGGAGCCGA  
 Reverse 2 : GGGCUGUGUCGAUAGGAGUCGCACCACGGGAAGGUGGUGCCGAAGCCUUAACAAGUGGUGGGAGCCGA  
 Reverse 80A : GGGCUGUGUCGAUAGGAGUCGCACCACGGGAAGGUGGUGCCGAAGCCUUAACAAGUGGUGGGAGCCGA

ss mRNA : ACCUCAUCUGUGGCUUCAGAGUGGUGCUCAUGUACAGAUUCGAGGAGGAGCUGUUUCUGAGGUCCCU  
 ss 80A mRNA : ACCUCAUCUGUGGCUUCAGAGUGGUGCUCAUGUACAGAUUCGAGGAGGAGCUGUUUCUGAGGUCCCU  
 Reverse 1 : UGGAGUAGACACCGAAGUCUACACCACGAGUACAUGUCUAAGCUCUCCUCGACAAAGACUCCAGGGA  
 Reverse 2 : UGGAGUAGACACCGAAGUCUACACCACGAGUACAUGUCUAAGCUCUCCUCGACAAAGACUCCAGGGA  
 Reverse 80A : UGGAGUAGACACCGAAGUCUACACCACGAGUACAUGUCUAAGCUCUCCUCGACAAAGACUCCAGGGA

ss mRNA : CCAGGACUACAAAUCCAAUCCGCUCUGCUCGUCCCCACCCUGUUCAGCUUCUUCGCCAAAAGCACC  
 ss 80A mRNA : CCAGGACUACAAAUCCAAUCCGCUCUGCUCGUCCCCACCCUGUUCAGCUUCUUCGCCAAAAGCACC  
 Reverse 1 : GGUCCUGAUGUUUAGGUUAGGCGAGACGAGCAGGGGUGGGACAAGUCGAAGAAGCGGUUUUCGUGG  
 Reverse 2 : GGUCCUGAUGUUUAGGUUAGGCGAGACGAGCAGGGGUGGGACAAGUCGAAGAAGCGGUUUUCGUGG  
 Reverse 80A : GGUCCUGAUGUUUAGGUUAGGCGAGACGAGCAGGGGUGGGACAAGUCGAAGAAGCGGUUUUCGUGG

ss mRNA : CUGAUCGACAAGUAUGACCUCUCCAACCUGCAUGAGAUCGCCAGCGGAGGAGCCCCUCUGUCCAAGG  
 ss 80A mRNA : CUGAUCGACAAGUAUGACCUCUCCAACCUGCAUGAGAUCGCCAGCGGAGGAGCCCCUCUGUCCAAGG  
 Reverse 1 : GACUAGCUGUUCAUACUGGAGAGGUUGGACGUACUCUAGCGGUCGCCUCCUCGGGGAGACAGGUUCC  
 Reverse 2 : GACUAGCUGUUCAUACUGGAGAGGUUGGACGUACUCUAGCGGUCGCCUCCUCGGGGAGACAGGUUCC  
 Reverse 80A : GACUAGCUGUUCAUACUGGAGAGGUUGGACGUACUCUAGCGGUCGCCUCCUCGGGGAGACAGGUUCC

ss mRNA : AGGUCGGCGAAGCCGUGGCUAAGAGGUUUCACCUCCUGGCAUUAAGGCAAGGAUACGGCCUGACCGA  
 ss 80A mRNA : AGGUCGGCGAAGCCGUGGCUAAGAGGUUUCACCUCCUGGCAUUAAGGCAAGGAUACGGCCUGACCGA  
 Reverse 1 : UCCAGCCGCUUCGGCACCGAUUCUCCAAGUGGAGGGACCGUAAUCCGUUCCUAUGCCGGACUGGCU  
 Reverse 2 : UCCAGCCGCUUCGGCACCGAUUCUCCAAGUGGAGGGACCGUAAUCCGUUCCUAUGCCGGACUGGCU  
 Reverse 80A : UCCAGCCGCUUCGGCACCGAUUCUCCAAGUGGAGGGACCGUAAUCCGUUCCUAUGCCGGACUGGCU



ss mRNA : AACCACAAGCGCUAUCCUGAUCACCCUGAGGGAGACGACAAACCCGGAGCCGUCGGAAAGGUCGUC  
 ss 80A mRNA : AACCACAAGCGCUAUCCUGAUCACCCUGAGGGGACGACAAACCCGGAGCCGUCGGAAAGGUCGUC  
 Reverse 1 : UUGGUGUUCGCGAUAGGACUAGUGGGGACUCCUCUGCUGUUGGGCCUCGGCAGCCUUUCAGCAG  
 Reverse 2 : UUGGUGUUCGCGAUAGGACUAGUGGGGACUCCUCUGCUGUUGGGCCUCGGCAGCCUUUCAGCAG  
 Reverse 80A : UUGGUGUUCGCGAUAGGACUAGUGGGGACUCCUCUGCUGUUGGGCCUCGGCAGCCUUUCAGCAG

ss mRNA : CCCUUCUUCGAGGCCAAGGUGGUCGACCCUGGACACCGCAAGACCCUGGGCGUGAACC AAAGGGGCG  
 ss 80A mRNA : CCCUUCUUCGAGGCCAAGGUGGUCGACCCUGGACACCGCAAGACCCUGGGCGUGAACC AAAGGGGCG  
 Reverse 1 : GGAAGAAGCUC CGGUUCCACCAGCUGGACCUUGGGCCGUUCUGGGACCCGCACUUGGUUUC CCGC  
 Reverse 2 : GGAAGAAGCUC CGGUUCCACCAGCUGGACCUUGGGCCGUUCUGGGACCCGCACUUGGUUUC CCGC  
 Reverse 80A : GGAAGAAGCUC CGGUUCCACCAGCUGGACCUUGGGCCGUUCUGGGACCCGCACUUGGUUUC CCGC

ss mRNA : AACUCUGUGAGGGGCCCUAUGAUCAUGAGCGGCUACGUCAACAACCCUGAGGCUACCAACGCUCU  
 ss 80A mRNA : AACUCUGUGAGGGGCCCUAUGAUCAUGAGCGGCUACGUCAACAACCCUGAGGCUACCAACGCUCU  
 Reverse 1 : UUGAGACACACUCCCCGGGAUACUAGUACUCGCCGAUGCAGUUGUUGGGACUCCGAUGGUUGCGAGA  
 Reverse 2 : UUGAGACACACUCCCCGGGAUACUAGUACUCGCCGAUGCAGUUGUUGGGACUCCGAUGGUUGCGAGA  
 Reverse 80A : UUGAGACACACUCCCCGGGAUACUAGUACUCGCCGAUGCAGUUGUUGGGACUCCGAUGGUUGCGAGA

ss mRNA : CAUCGACAAGGAUGGCUGGCUGCACUCCGGAGAUAUUCGCCUACUGGGACGAGGAUGAGCAUUUUUU  
 ss 80A mRNA : CAUCGACAAGGAUGGCUGGCUGCACUCCGGAGAUAUUCGCCUACUGGGACGAGGAUGAGCAUUUUUU  
 Reverse 1 : GUAGCUGUUCUACCGACCCGACGUGAGGCCUCUAUAGCGGAUGACCCUGCUCUACUCGUAAAAAAA  
 Reverse 2 : GUAGCUGUUCUACCGACCCGACGUGAGGCCUCUAUAGCGGAUGACCCUGCUCUACUCGUAAAAAAA  
 Reverse 80A : GUAGCUGUUCUACCGACCCGACGUGAGGCCUCUAUAGCGGAUGACCCUGCUCUACUCGUAAAAAAA

ss mRNA : AUCGUCGAUAGGCUCAAGAGCCUGAUC AAGUACAAGGGCUACCAGGUGGCCCCUGCUGAGCUCGAAU  
 ss 80A mRNA : AUCGUCGAUAGGCUCAAGAGCCUGAUC AAGUACAAGGGCUACCAGGUGGCCCCUGCUGAGCUCGAAU  
 Reverse 1 : UAGCAGCUAUCCGAGUUCUCGGACUAGUUCAUGUUC CCGAUGGUCCACCGGGGACGACUCGAGCUUA  
 Reverse 2 : UAGCAGCUAUCCGAGUUCUCGGACUAGUUCAUGUUC CCGAUGGUCCACCGGGGACGACUCGAGCUUA  
 Reverse 80A : UAGCAGCUAUCCGAGUUCUCGGACUAGUUCAUGUUC CCGAUGGUCCACCGGGGACGACUCGAGCUUA

ss mRNA : CCAUCCUGCUC CAGCACCCUAACAUCUUGACGCGUGGCGUGGCGUGGACUGCCUGACGACGACGCGUGG  
 ss 80A mRNA : CCAUCCUGCUC CAGCACCCUAACAUCUUGACGCGUGGCGUGGCGUGGACUGCCUGACGACGACGCGUGG  
 Reverse 1 : GGUAGGACGAGGUCGUGGGAUUGUAGAAACUGCGACCCGACCCGACCCUGACGACGACGACGCGACC  
 Reverse 2 : GGUAGGACGAGGUCGUGGGAUUGUAGAAACUGCGACCCGACCCGACCCUGACGACGACGACGCGACC  
 Reverse 80A : GGUAGGACGAGGUCGUGGGAUUGUAGAAACUGCGACCCGACCCGACCCUGACGACGACGACGCGACC

ss mRNA : CGAACUCCUGCCGUCUGCUGGUCUCGAACACGGCAAGACA AUGACCGAGAAGGAGAUUCGUGGAC  
 ss 80A mRNA : CGAACUCCUGCCGUCUGCUGGUCUCGAACACGGCAAGACA AUGACCGAGAAGGAGAUUCGUGGAC  
 Reverse 1 : GCUUGAGGGACGGCGACAGCACCAGGAGCUUGUGCCGUUCUGUACUGGCUCUUCUCUAGCACCUG  
 Reverse 2 : GCUUGAGGGACGGCGACAGCACCAGGAGCUUGUGCCGUUCUGUACUGGCUCUUCUCUAGCACCUG  
 Reverse 80A : GCUUGAGGGACGGCGACAGCACCAGGAGCUUGUGCCGUUCUGUACUGGCUCUUCUCUAGCACCUG

ss mRNA : UACGUGGCCUCCCAAGUGACAACAGCCAAGAAGCUGAGAGGGCGGAGUGGUGUUCGUGGACGAGGUGC  
 ss 80A mRNA : UACGUGGCCUCCCAAGUGACAACAGCCAAGAAGCUGAGAGGGCGGAGUGGUGUUCGUGGACGAGGUGC  
 Reverse 1 : AUGCACC GGAGGGUUCACUGUUGUCGGUUCUUCGACUCUCCGCCUCACCACAAGCACCUGCUC CACG  
 Reverse 2 : AUGCACC GGAGGGUUCACUGUUGUCGGUUCUUCGACUCUCCGCCUCACCACAAGCACCUGCUC CACG  
 Reverse 80A : AUGCACC GGAGGGUUCACUGUUGUCGGUUCUUCGACUCUCCGCCUCACCACAAGCACCUGCUC CACG

ss mRNA : CCAAGGGCCUGACAGGCAAGCUCGACGCUAGAAAGAU CAGGGAGAUUCUGAUUAAAGCCAAAAGGG  
 ss 80A mRNA : CCAAGGGCCUGACAGGCAAGCUCGACGCUAGAAAGAU CAGGGAGAUUCUGAUUAAAGCCAAAAGGG  
 Reverse 1 : GGUUCCCGGACUGCCGUUCGAGCUGCGAUUUUCUAGUCCUCUAAGACUAAUUUCGGUUUUUCC
